# Supplementary material for: Engineered mesenchymal stromal cell therapy during human lung ex vivo lung perfusion is compromised by acidic lung microenvironment
Source: PubMed Central journal article supplement — Mol Ther Methods Clin Dev. 2021 Sep 20;23:184–97. doi: 10.1016/j.omtm.2021.05.018 (PMC8516994; doi:10.1016/j.omtm.2021.05.018), 2021-09-20
Supplement: mmc1.pdf [file mmc1.pdf]

**Supplemental information**

**Engineered mesenchymal stromal cell therapy  
during human lung *ex vivo* lung perfusion  
is compromised by acidic lung microenvironment**

**Antti I. Nykänen, Andrea Mariscal, Allen Duong, Catalina Estrada, Aadil Ali, Olivia Hough, Andrew Sage, Bonnie T. Chao, Manyin Chen, Hemant Gokhale, Hongchao Shan, Xiaohui Bai, Guan Zehong, Jonathan Yeung, Tom Waddell, Tereza Martinu, Stephen Juvet, Marcelo Cypel, Mingyao Liu, John E. Davies, and Shaf Keshavjee**

**Table S1. EVLP and MSC-treatment baseline parameters**

|                                          | Control          | MSC <sup>IL-10</sup> | p-value |
|------------------------------------------|------------------|----------------------|---------|
| n=                                       | 4                | 5                    |         |
| Cold ischemia time, h                    | 9.0 (7.6-12.3)   | 8.9 (7.9-11.6)       | 0.90    |
| EVLP 1-hour (pre-MSC) parameters         |                  |                      |         |
| PAP, mmHg                                | 8.0 (7.3-10.3)   | 8.0 (6.5-11.5)       | 0.97    |
| PVR, dynes/sec/cm <sup>-5</sup>          | 400 (263-599)    | 444 (282-607)        | 0.99    |
| Peak airway pressure, cmH2O              | 13.5 (12.3-18.5) | 13 (11.0-17.0)       | 0.63    |
| Mean airway pressure, cmH2O              | 7.0 (6.3-7.8)    | 7.0 (6.0-7.5)        | 0.98    |
| Dynamic compliance, ml/cmH2O             | 36 (26-63)       | 38 (27-45)           | 0.99    |
| Static compliance, ml/cmH2O              | 56 (50-97)       | 72 (43-78)           | 0.96    |
| Delta PaO2, mmHg                         | 401 (216-503)    | 369 (334-444)        | 0.90    |
| MSC treatment                            |                  |                      |         |
| MSC administration after thawing, min    |                  | 74 (66-91)           | NA      |
| MSC administration after EVLP start, min |                  | 85 (82-92)           | NA      |
| MSC viability at administration, %       |                  | 97 (91-97)           | NA      |

EVLP, Ex Vivo Lung Perfusion; IL-10, interleukin-10; MSC, mesenchymal stromal cell; PAP, pulmonary artery pressure; POD, postoperative day; PVR, pulmonary vascular resistance  
Data median (interquartile range), analyzed by Mann-Whitney test

# Supplemental Figure 1

|         | X-ray                                                                               | Right                                                                               | Left                                                                                |                                                                                                                                                                                                                                                                            |
|---------|-------------------------------------------------------------------------------------|-------------------------------------------------------------------------------------|-------------------------------------------------------------------------------------|----------------------------------------------------------------------------------------------------------------------------------------------------------------------------------------------------------------------------------------------------------------------------|
| Case #1 | 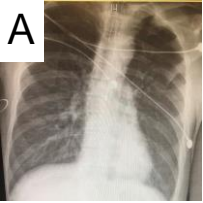   |    |    | <p>Donor: 46 male, DCD<br/>           Cause of death: choking<br/>           Last P/F-ratio: 458 mmHg<br/>           Lung injury: LLL aspiration pneumonia<br/>           Right: control<br/>           Left: <math>40 \times 10^6</math> MSC<sup>IL-10</sup></p>          |
| Case #2 |    |    |    | <p>Donor 54 female, DBD<br/>           Cause of death: over-dose<br/>           Last P/F-ratio: 260 mmHg<br/>           Lung injury: RLL aspiration pneumonia<br/>           Right: <math>40 \times 10^6</math> MSC<sup>IL-10</sup><br/>           Left: control</p>       |
| Case #3 |   |   |   | <p>Donor 31 female, DCD<br/>           Cause of death: over-dose<br/>           Last P/F-ratio: 180 mmHg<br/>           Lung injury: bilateral aspiration pneumonia<br/>           Right: control<br/>           Left: <math>40 \times 10^6</math> MSC<sup>IL-10</sup></p> |
| Case #4 |  |  |  | <p>Donor 49 male, DBD<br/>           Cause of death: choking<br/>           Last P/F-ratio: 97 mmHg<br/>           Lung injury: RLL aspiration pneumonia<br/>           Right: Not used<br/>           Left: <math>40 \times 10^6</math> MSC<sup>IL-10</sup></p>           |
| Case #5 |  |  |  | <p>Donor 23 female, DBD<br/>           Cause of death: drowning<br/>           Last P/F-ratio: 472 mmHg<br/>           Lung injury: Concerns of LL necrotic areas<br/>           Right: control<br/>           Left: <math>40 \times 10^6</math> MSC<sup>IL-10</sup></p>   |

**Figure S1. Human donor lungs used in the study.** Human lungs rejected from clinical transplantation for various reasons were used in the study (n=5). (A-E) Chest x-ray and lung retrieval photos, and donor and treatment group information are given for each case. The double lung was split, each lung was connected to separate single-lung EVLP circuits, and one lung was randomized to MSC<sup>IL-10</sup> treatment while the contralateral lung served as a control (n=4). (D) In one case, the right lung with aspiration pneumonia had extensive right lower lobe atelectasis requiring recruitment with high airway pressures up to 35mmHg during the donor lung retrieval. Due to lung quality issues and a clinical concern that it was too damaged to last the planned 12-hour EVLP experiment, the right lung was not used for the experiment, and only the left lung was connected to EVLP and treated with MSC<sup>IL-10</sup> cells. DBD, donation after brain death; DCD, donation after circulatory death; IL-10, interleukin-10; LL, lower lobe; LLL, left lower lobe; MSC, mesenchymal stromal cell; P/F-ratio, ratio of arterial oxygen partial pressure to fractional inspired oxygen; RLL, right lower lobe.

## Supplemental Figure 2

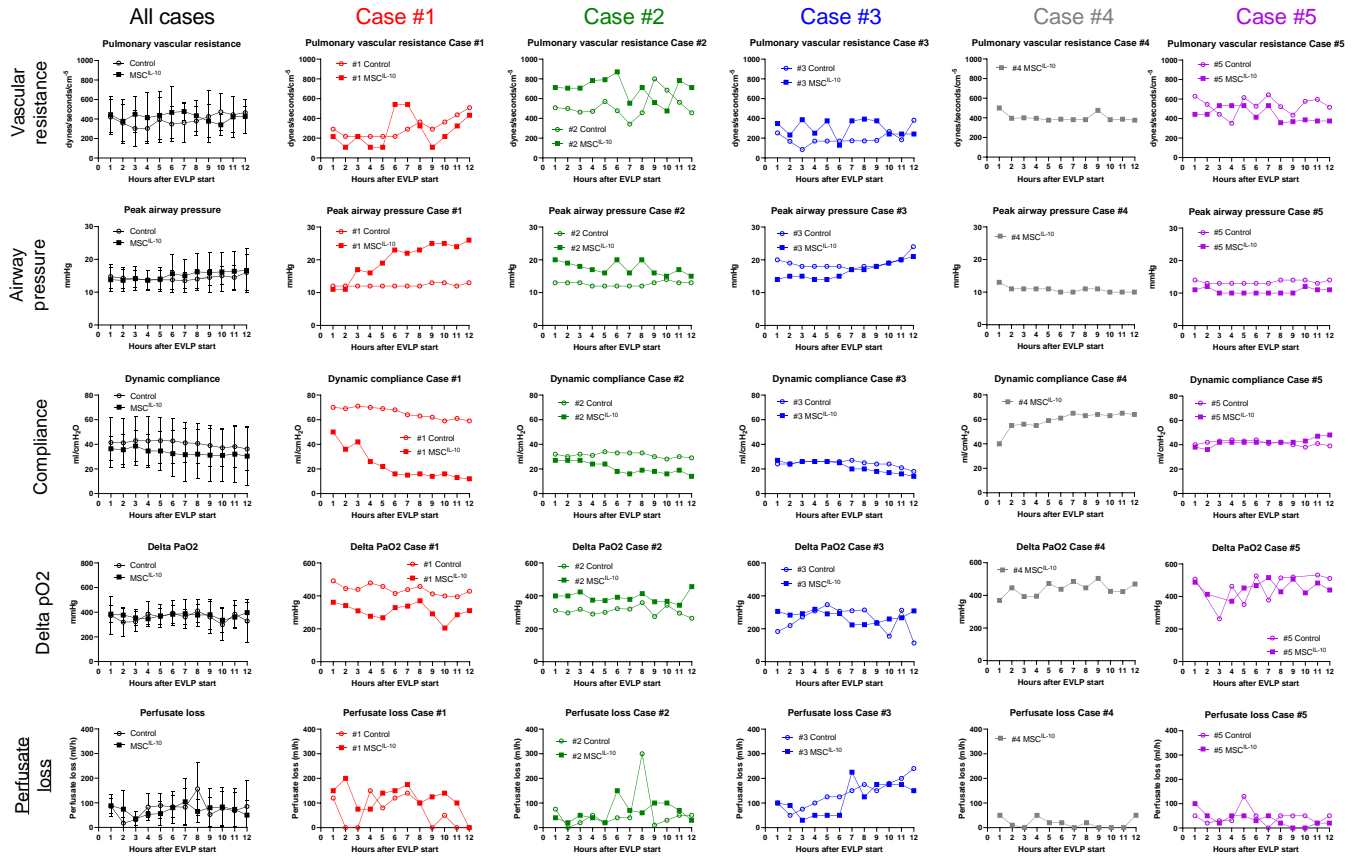

**Figure S2. Lung function during EVLP with median values of all cases and individual cases.**

Pulmonary artery resistance, peak airway pressure, dynamic compliance, delta PaO<sub>2</sub> and perfusate loss were recorded hourly. Median values for control (n=4) and MSC<sup>IL-10</sup> (n=5) groups are given in the left column and individual values of cases 1-5 in the remaining columns. Data on the left column expressed as median±interquartile range and analyzed by 2-way ANOVA. EVLP, ex vivo lung perfusion; IL-10, interleukin-10; MSC, mesenchymal stromal cell.

## Supplemental Figure 3

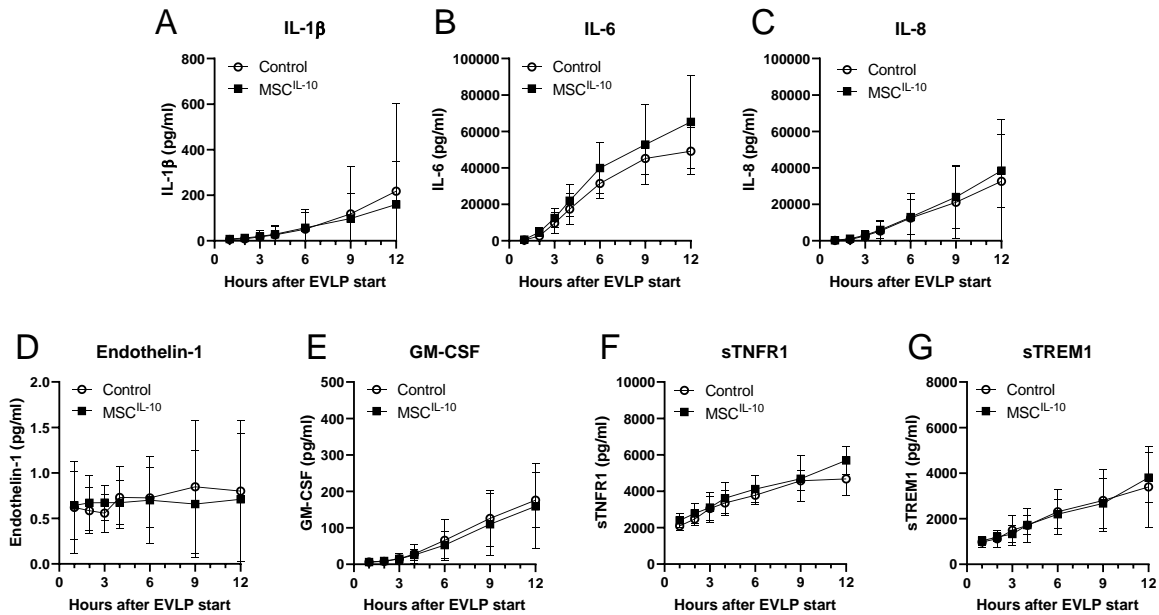

**Figure S3. Perfusate cytokines during EVLP.** Perfusate samples were taken every hour and assessed for (A) IL-1 $\beta$ , (B) IL-6, (C) IL-8, (D) endothelin-1, (E) GM-CSF, (F) sTNFR1 and (G) sTREM1 using multianalyte immunoassays. Control (n=4) and MSC<sup>IL-10</sup> (n=5). Data expressed as median $\pm$ interquartile range and analyzed by 2-way ANOVA. EVLP, ex vivo lung perfusion; GM-CSF, granulocyte-macrophage colony-stimulating factor; IL, interleukin; sTNFR1, soluble tumor necrosis factor receptor 1; sTREM1, soluble triggering receptor expressed by myeloid cells

1.

## Supplemental Figure 4

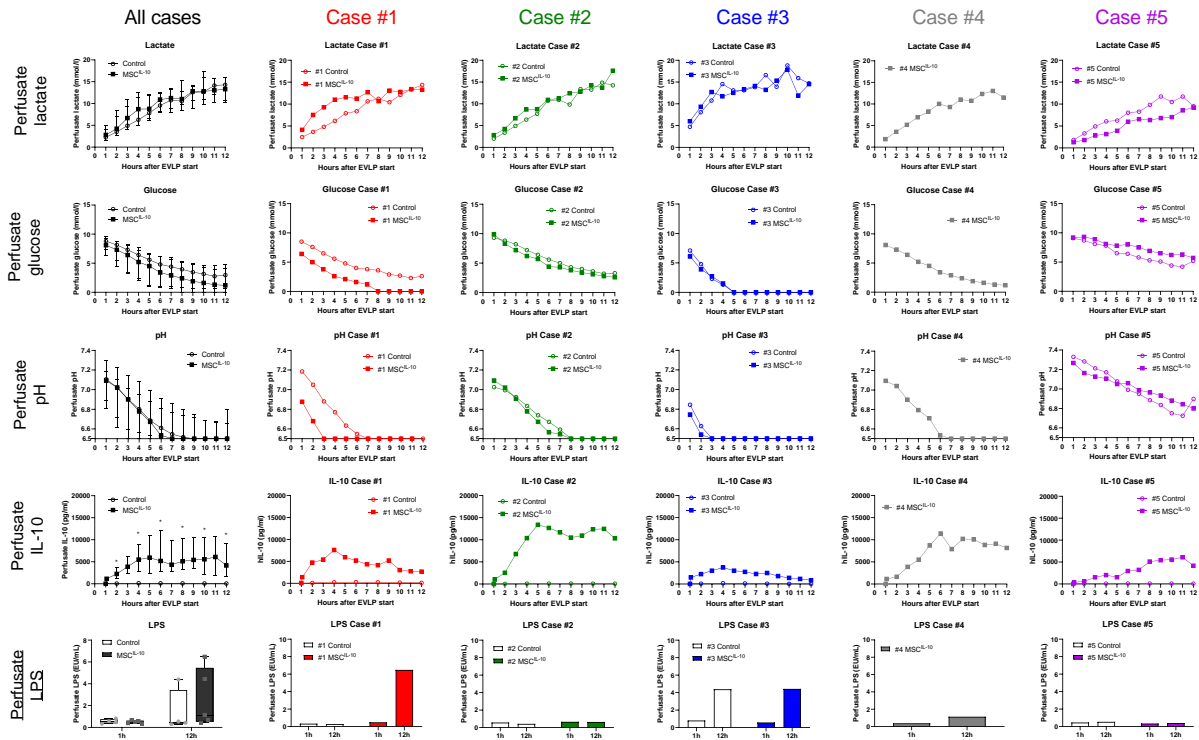

**Figure S4. Perfusate metabolic markers, IL-10 and LPS during EVLP with median values of all cases and individual cases.** Perfusate samples were taken every hour and assessed for glucose, lactate, pH, IL-10 and LPS levels. Median values ( $\pm$ interquartile range) for control (n=4) and MSC<sup>IL-10</sup> groups (left column) and individual values for cases 1-5. Data on the left column analyzed by 2-way ANOVA. EU, endotoxin unit; EVLP, ex vivo lung perfusion; IL-10, interleukin-10; LPS, lipopolysaccharide; MSC, mesenchymal stromal cell.

## Supplemental Figure 5

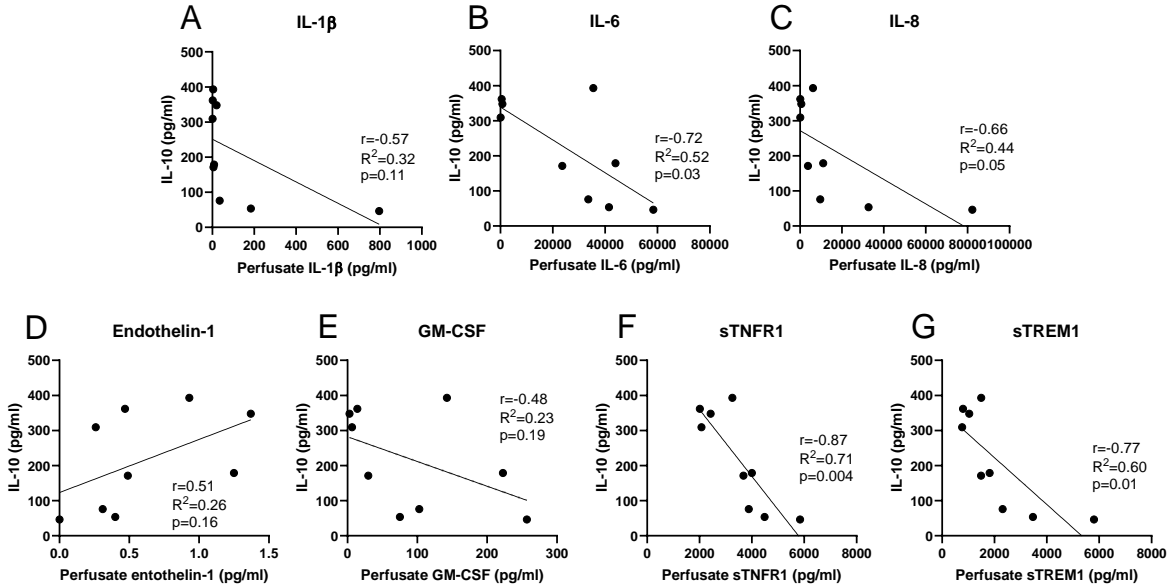

**Figure S5. Perfusate proinflammatory and damage-related conditions are associated with decreased MSC<sup>IL-10</sup> IL-10 production *in vitro*.** MSC<sup>IL-10</sup> were plated *in vitro*, cultured in 9 different human EVLP perfusate samples, and IL-10 secretion was measured at 4 hours. The 9 samples used consisted of 1-, 6- and 12-hour perfusate samples of control group cases 1-3 resulting in a spectrum of different baseline cytokine concentrations that were measured by ELISA. Correlation of 4-hour IL-10 concentration with respective baseline perfusate (A) IL-1 $\beta$ , (B) IL-6, (C) IL-8, (D) endothelin-1, (E) GM-CSF, (F) sTNFR1 and (G) sTREM1 concentrations. Data analyzed by linear regression and Pearson coefficient test. EVLP, ex vivo lung perfusion; GM-CSF, granulocyte-macrophage colony-stimulating factor; IL, interleukin; MSC, mesenchymal stromal cell; sTNFR1, soluble tumor necrosis factor receptor 1; sTREM1, soluble triggering receptor expressed by myeloid cells 1.
